# Supplementary figures and images for: Multi-Omics Analysis Revealed Increased De Novo Synthesis of Serine and Lower Activity of the Methionine Cycle in Breast Cancer Cell Lines
Source: MDPI journal article supplement (doi:10.3390/molecules28114535), 2023-06-03

■ FDR ≤ 0.05    ■ FDR > 0.05

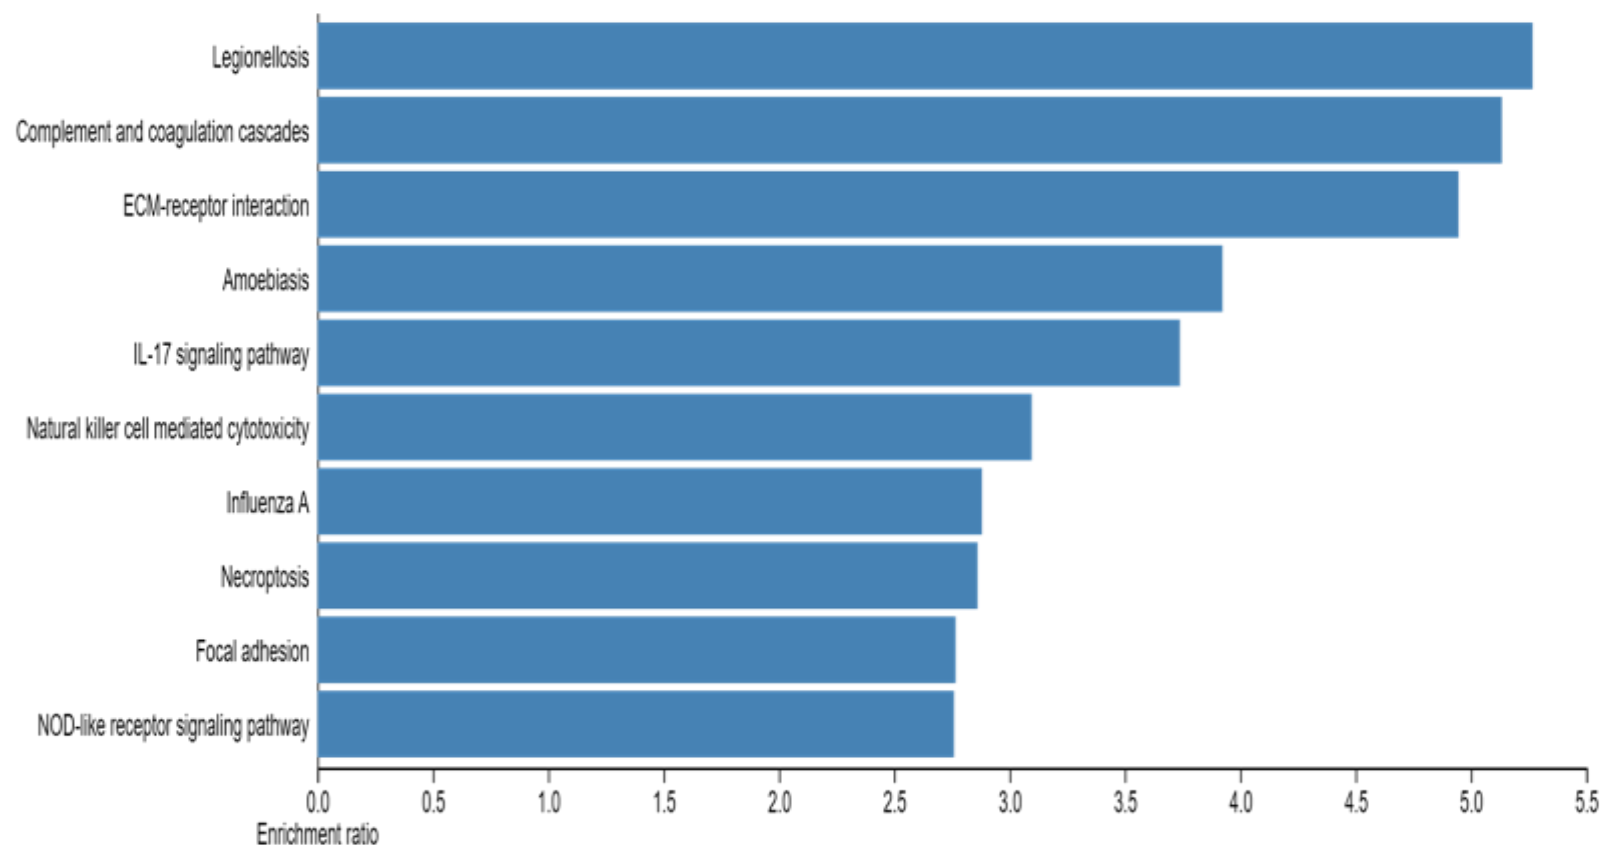

Supplement: s1 [file s1]
